# Supplementary material for: Enhanced Dissolution of Naproxen by Combining Cocrystallization and Eutectic Formation
Source: MDPI journal article supplement (doi:10.3390/pharmaceutics13050618), 2021-04-25

# Supplementary Materials: Enhanced Dissolution of Naproxen by Combining Cocrysal-li-zation and Eutectic Formation

Hak Yeong Kim, Soeun Jang and Il Won Kim

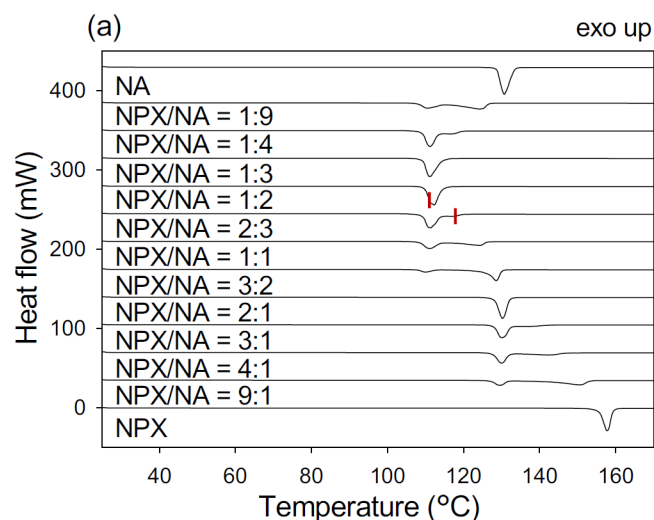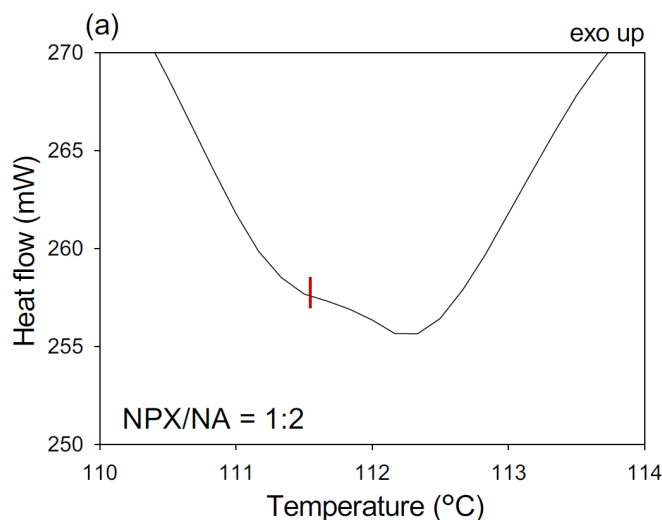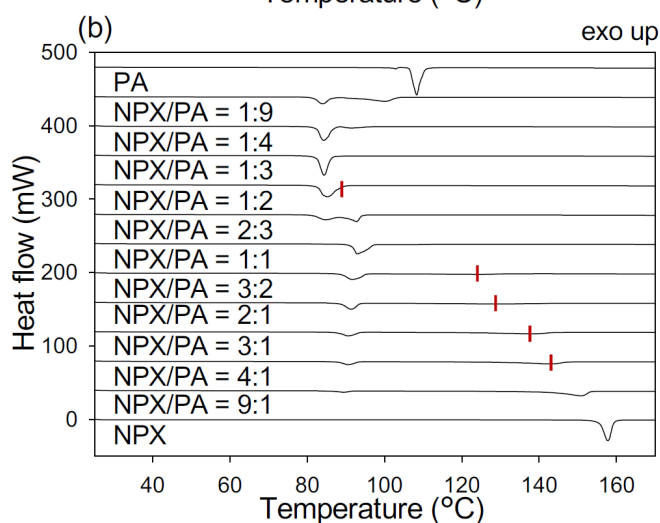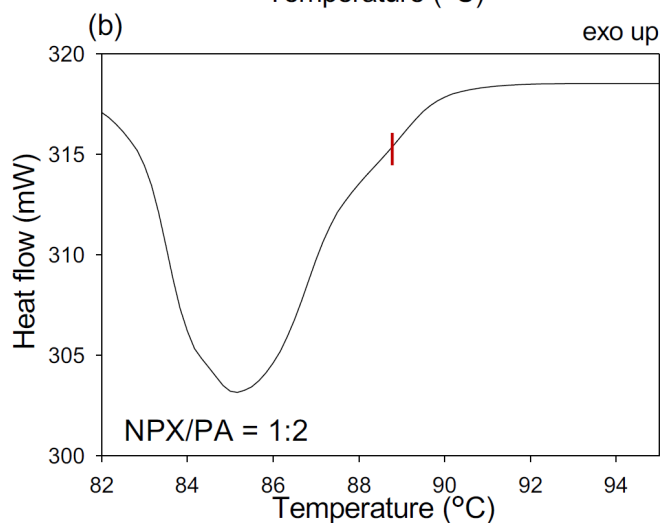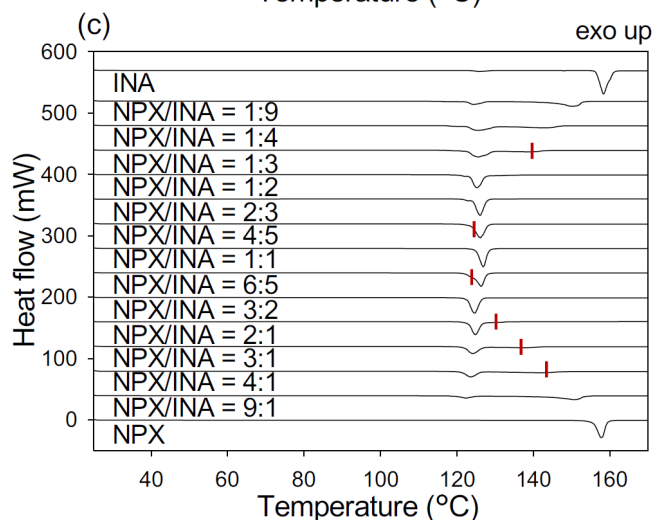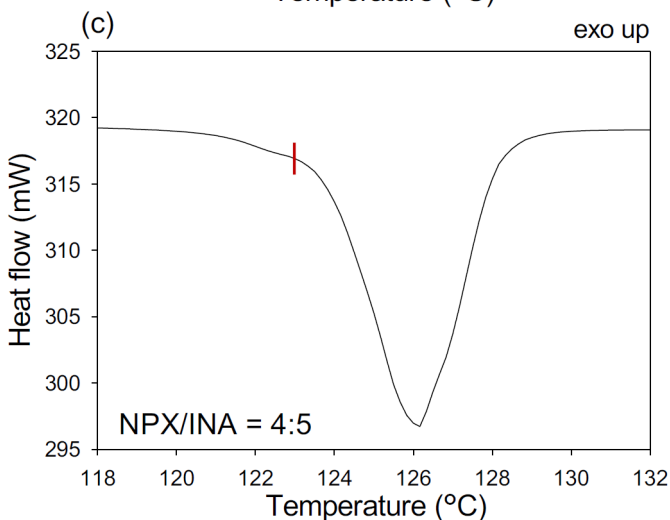

**Figure S1.** DSC thermograms of (a) NPX/NA, (b) NPX/PA, and (c) NPX/INA mixtures.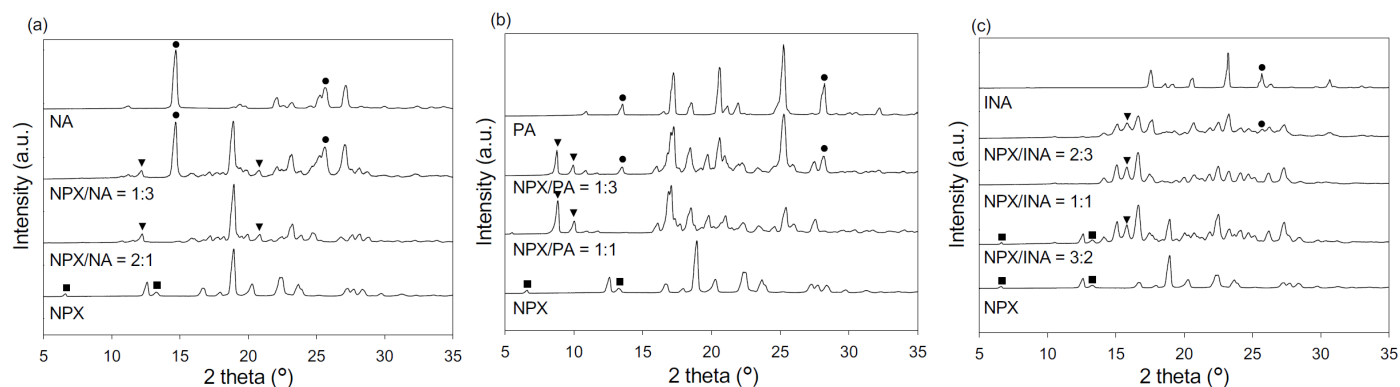**Figure S2.** XRD patterns of some mixtures of (a) NPX/NA, (b) NPX/PA, and (c) NPX/INA.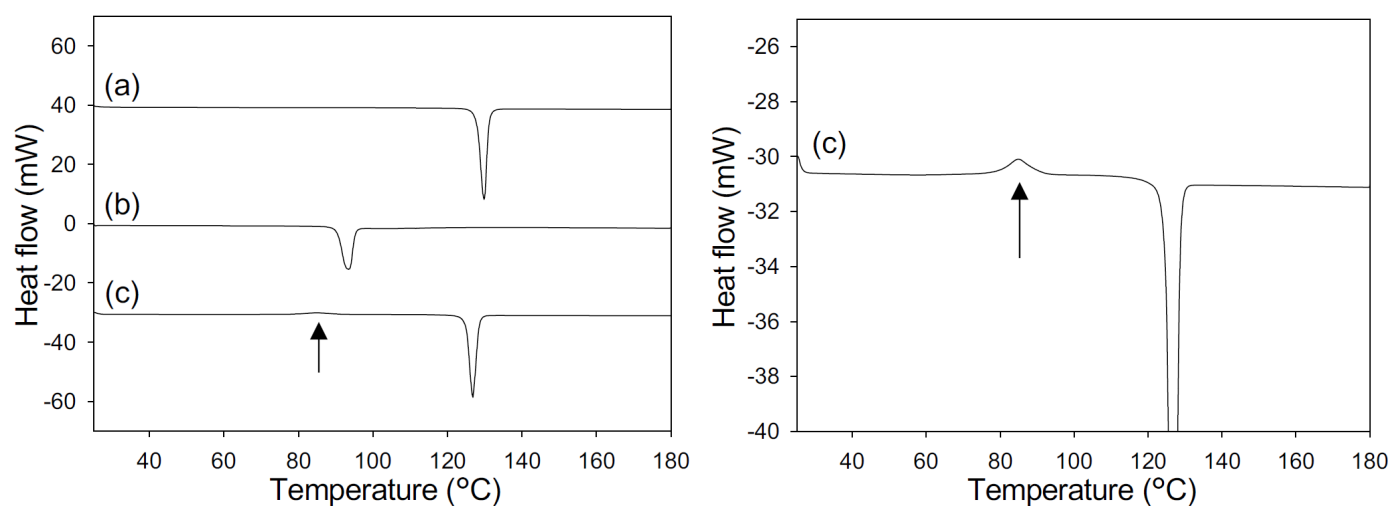**Figure S3.** DSC thermograms of melt crystallized cocrystals of (a) NPX/NA, (b) NPX/PA, and (c) NPX/INA.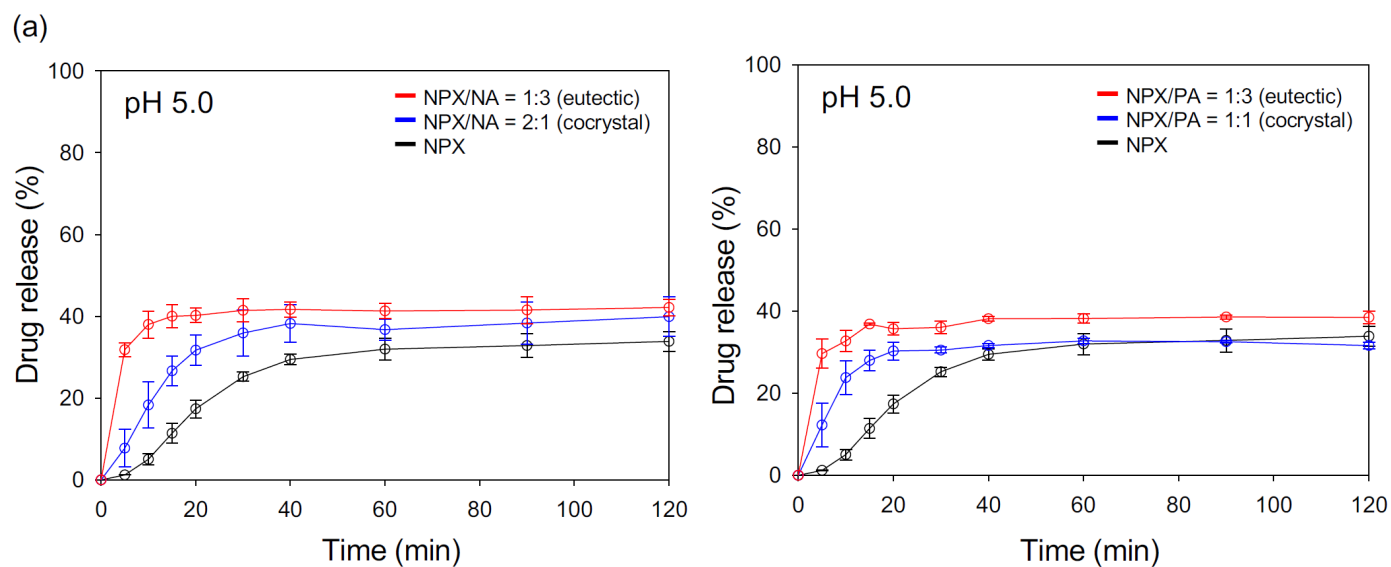

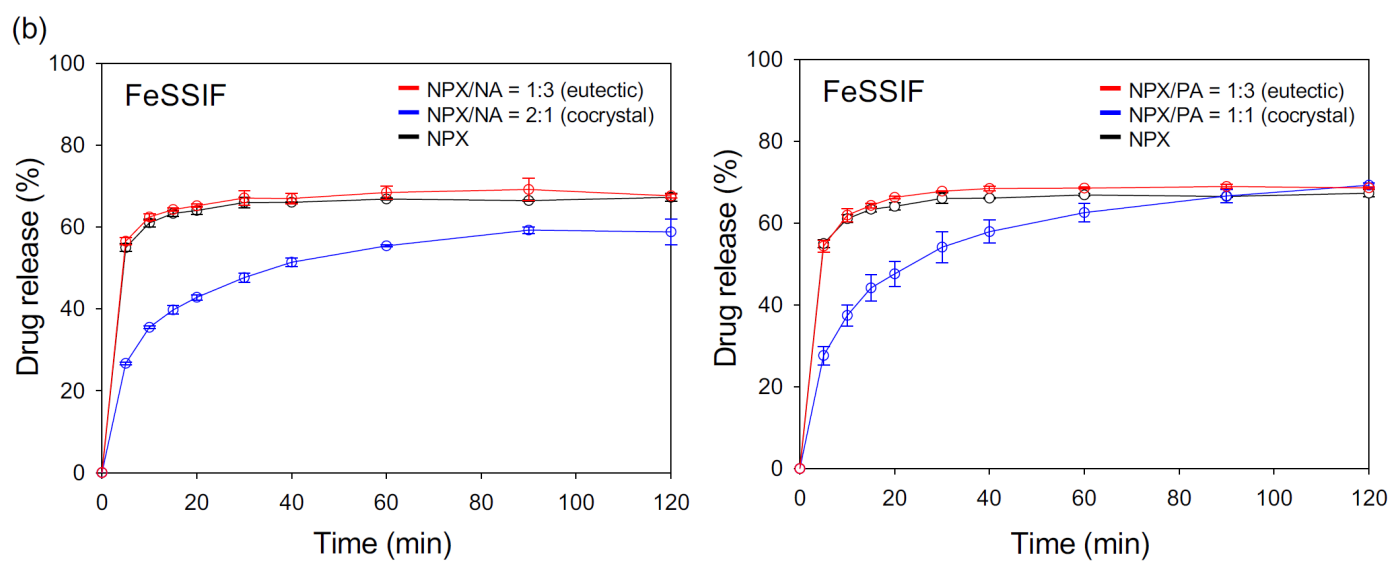

Supplement: s1 [file s1]
